# Supplementary material for: Basal‐like breast cancer engages tumor‐supportive macrophages via secreted factors induced by extracellular S100A4
Source: PubMed Central journal article supplement (PMC6120223; doi:10.1002/1878-0261.12319), 2018-08-09
Supplement: MOL2-12-1540-s001.pdf [file MOL2-12-1540-s001.pdf]

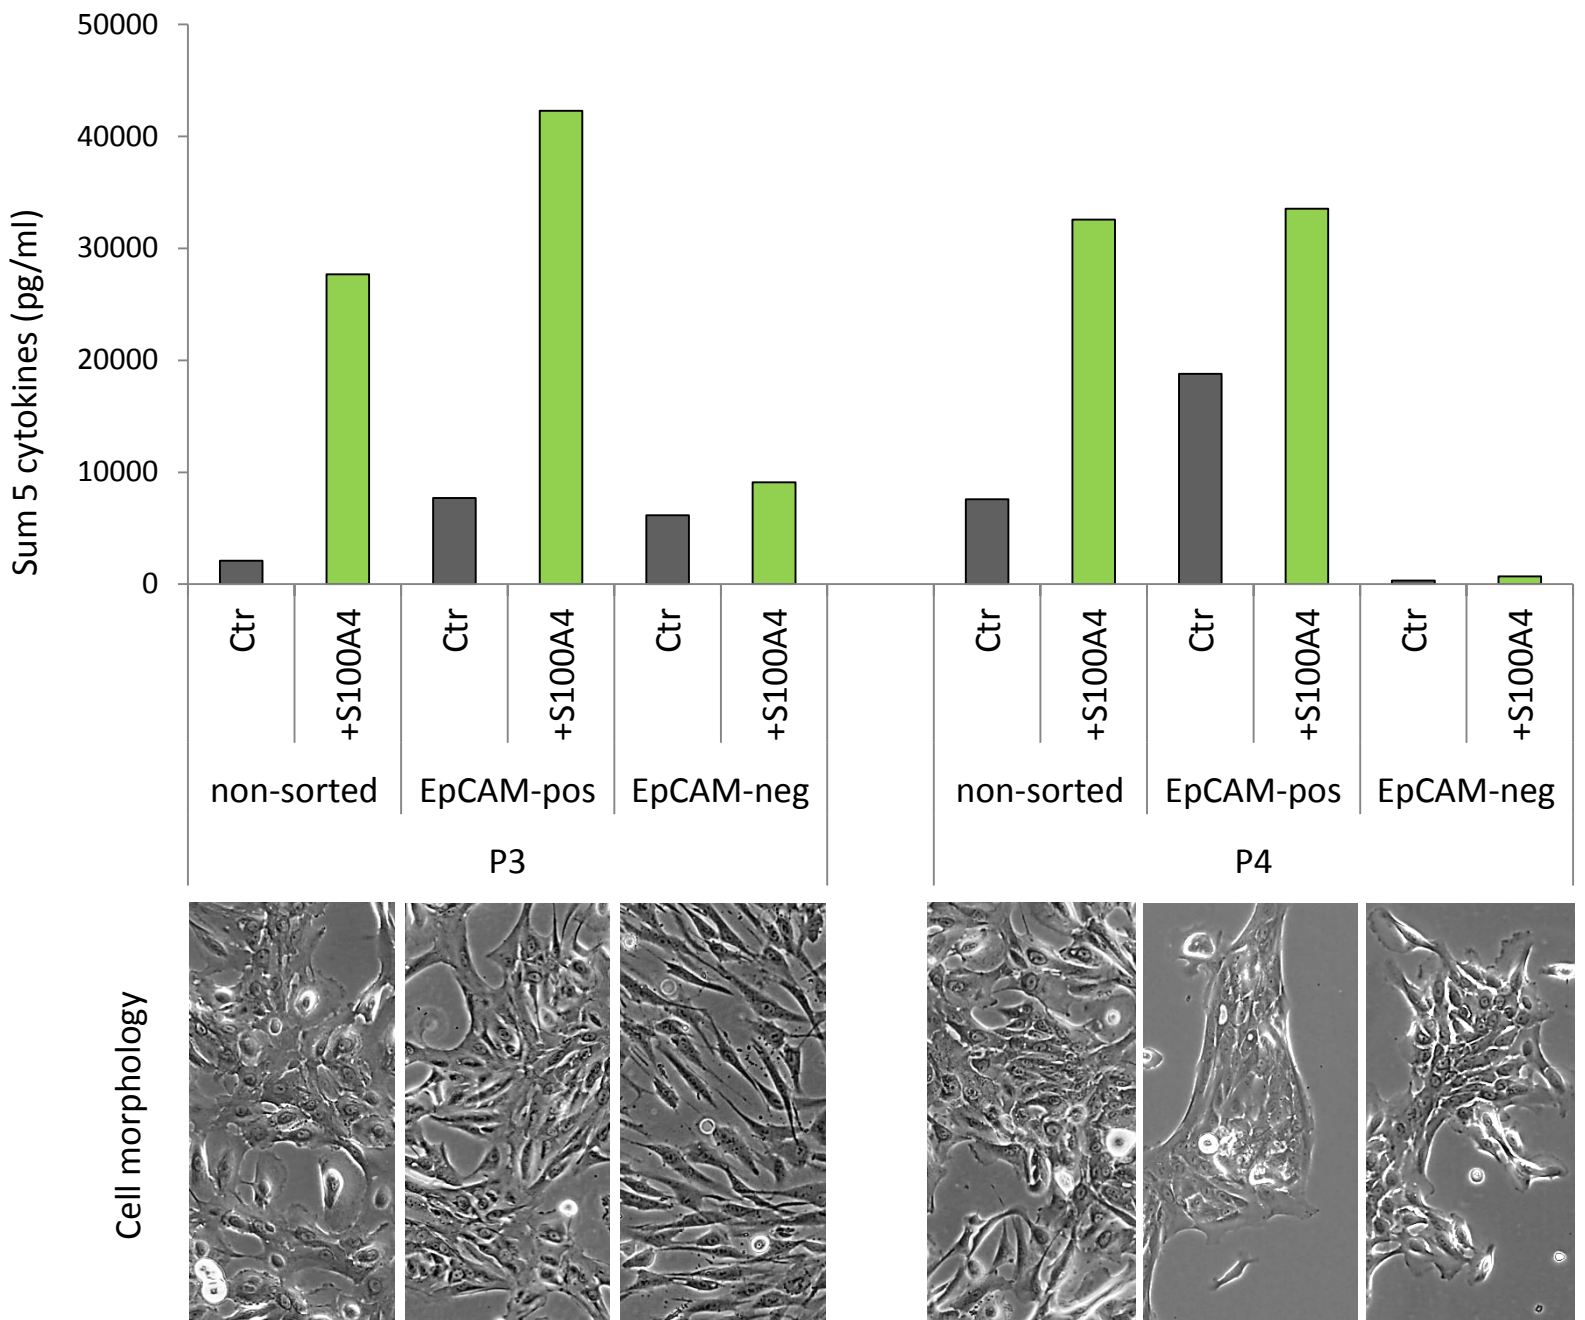

**Supplementary Figure S1. S100A4 induced cytokine production is observed in EpCAM positive BCCs, but not in EpCAM negative stromal cells.** Cells from two patient biopsies (P3 and P4) were propagated in culture and FACS sorted into EpCAM-positive (enriched for BCCs) and EpCAM-negative (enriched for stromal cells) subpopulations. Each subpopulation was stimulated with 2  $\mu\text{g/ml}$  rS100A4 (controls, non-stimulated) for 24 hrs and the growth medium was analyzed for cytokine levels by the multiplex immunoassay. The total level of five most abundant cytokines (IL-8, IL-6, CXCL10, CCL2 and CCL5) in each subpopulation and non-sorted cells, with/without S100A4 stimulation, is presented in the upper graph. Phase contrast images illustrate the morphology of each culture.

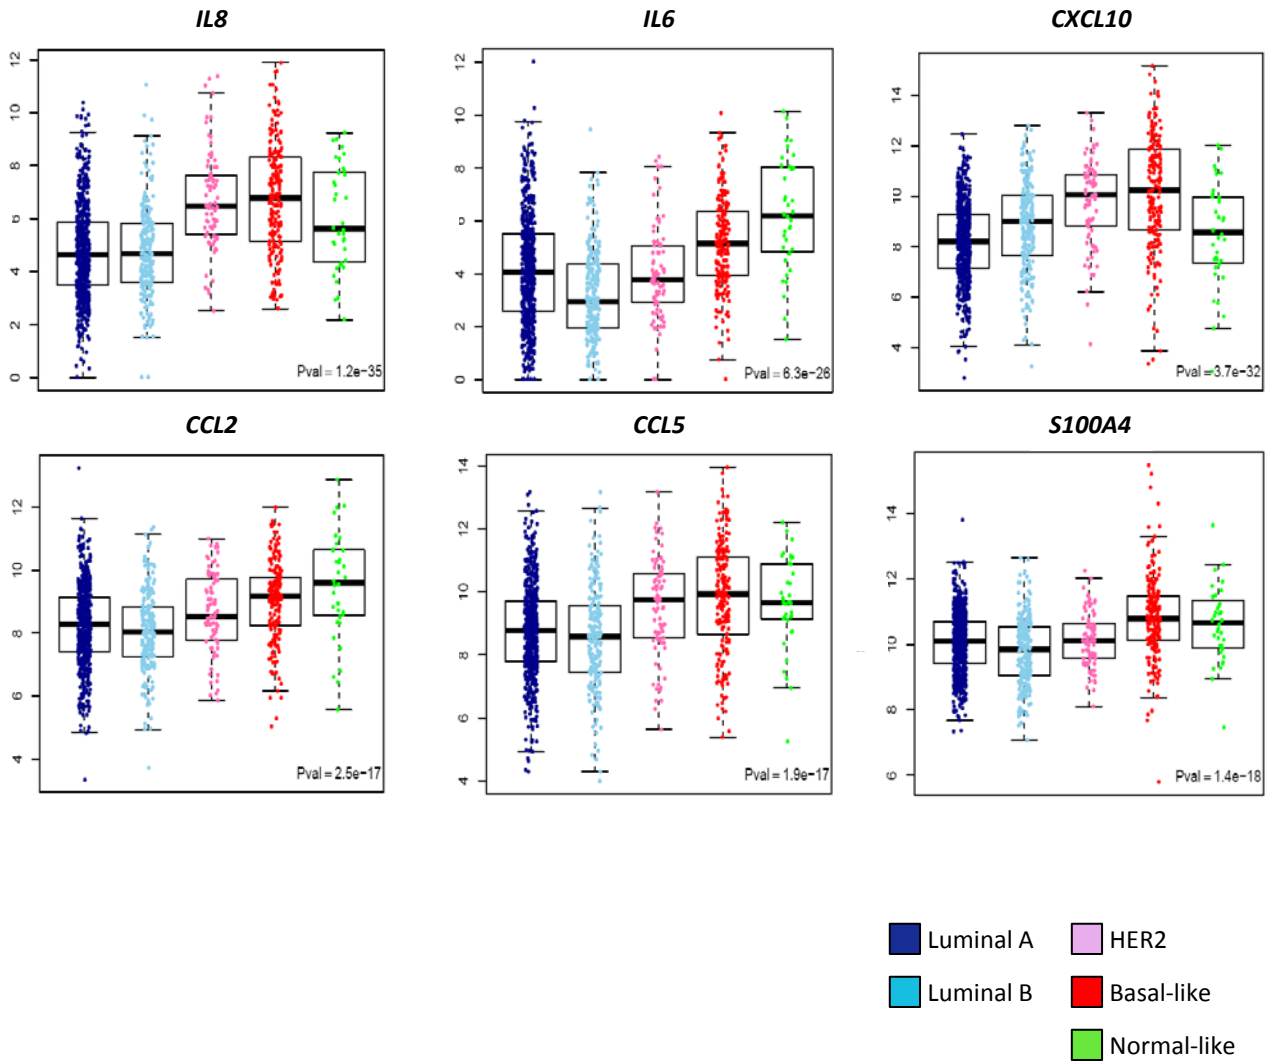

**Supplementary Figure S2. Gene expression levels of the most abundant S100A4-inducible cytokines and S100A4 itself in the five molecular subtypes of BC from TCGAs collection of breast tumors.** P-values indicated significant difference in expression between the subtypes. Kruskal-Wallis rank sum test was used to assess significant differences.

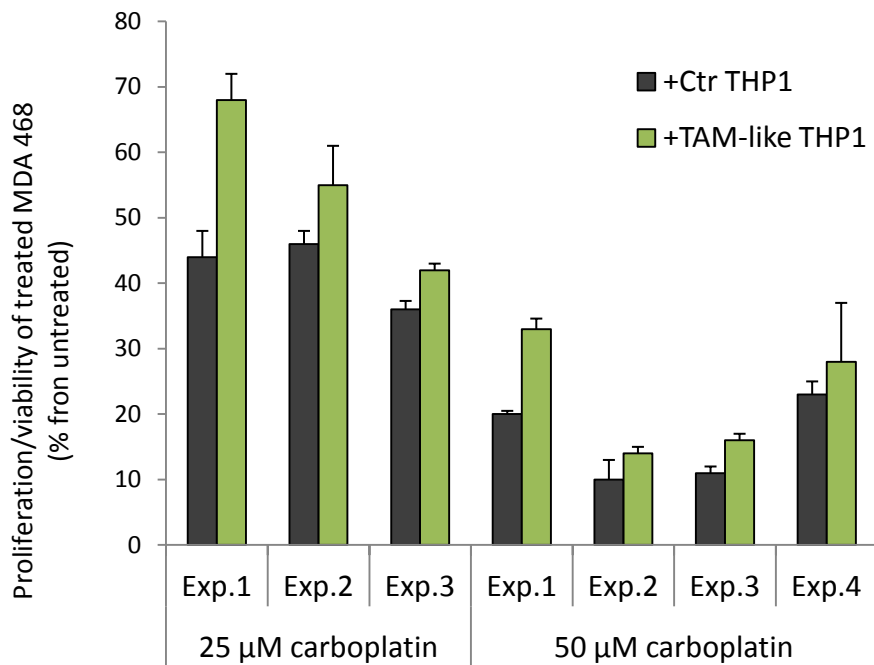

**Supplementary Figure S3. TAM-like THP1 make MDA468 cells less sensitive to carboplatin.** The co-cultures of GFP-Luc labeled MDA468 cells and Ctr THP1 or TAM-like THP1 were treated with 25  $\mu$ M or 50  $\mu$ M carboplatin for 3 days. The proliferation/viability of the treated cancer cells was scored by measuring Luc-mediated bioluminescence and is presented as % from respective untreated controls. The graph indicates average  $\pm$  StDev from 3 technical parallels in each experiment (Exp.)

**Supplementary Table S1.** Primer sequences and probes used for qPCR.

| <b>Gene</b>                 | <b>Primer sequence</b>                                                    | <b>Universal probe</b> |
|-----------------------------|---------------------------------------------------------------------------|------------------------|
| <i>iNOS</i>                 | forward: attcagctgtgccttcaacc<br>reverse: cattgccaaacgtactggtc            | #66                    |
| <i>CD206</i>                | forward: ggctacatatgccagacacg<br>reverse: ttaacaaagccatctgtttgaatc        | #67                    |
| <i>IL8</i>                  | forward: agacagcagagcacacaagc<br>reverse: atggttccttccgggtgt              | # 72                   |
| <i>IL6</i>                  | forward: gatgagtacaaaagtcctgatcca<br>reverse: ctgcagccactggttctgt         | #40                    |
| <i>CCL2</i>                 | forward: agtctctgccgcccttct<br>reverse: gtgactggggcattgattg               | #83                    |
| <i>CCL5</i>                 | forward: cgctgtcatcctcattgcta<br>reverse: ggtgtggtgtccgaggaata            | #16                    |
| <i>CXCL10</i>               | forward: gaaagcagtttagcaaggaaaggt<br>reverse: gacatatactccatgtaggggaagtga | #34                    |
| <i>CDH1</i>                 | forward: gacacatttatggaacagaaaataaca<br>reverse: agtggaatggcaccagtgt      | #20                    |
| <i>KRT19</i>                | forward: gccactactacagaccatcc<br>reverse: caaacttggttcggaagtc             | #71                    |
| <i>EPCAM</i>                | forward: ctccacgtgctggtgtgt<br>reverse: tgttttagtcaatgatgatccagta         | #3                     |
| <i>SNAI1</i>                | forward: gctgcaggactctaataccaga<br>reverse: atctccggaggtgggatg            | #62                    |
| <i>YARS (housekeeping)</i>  | forward: ggattaacaggcagcaaaatg<br>reverse: cctccgatcaaggagatca            | #35                    |
| <i>RPL27 (housekeeping)</i> | forward: cgcaaagctgtcatcgtg<br>reverse: gtcactttgcggggtag                 | #83                    |
